# Supplementary material for: High-Throughput Continuous-Flow Separation in a Micro Free-Flow Electrophoresis Glass Chip Based on Laser Microfabrication
Source: MDPI journal article supplement (doi:10.3390/s22031124), 2022-02-01
Supplement: s1 [file s1]

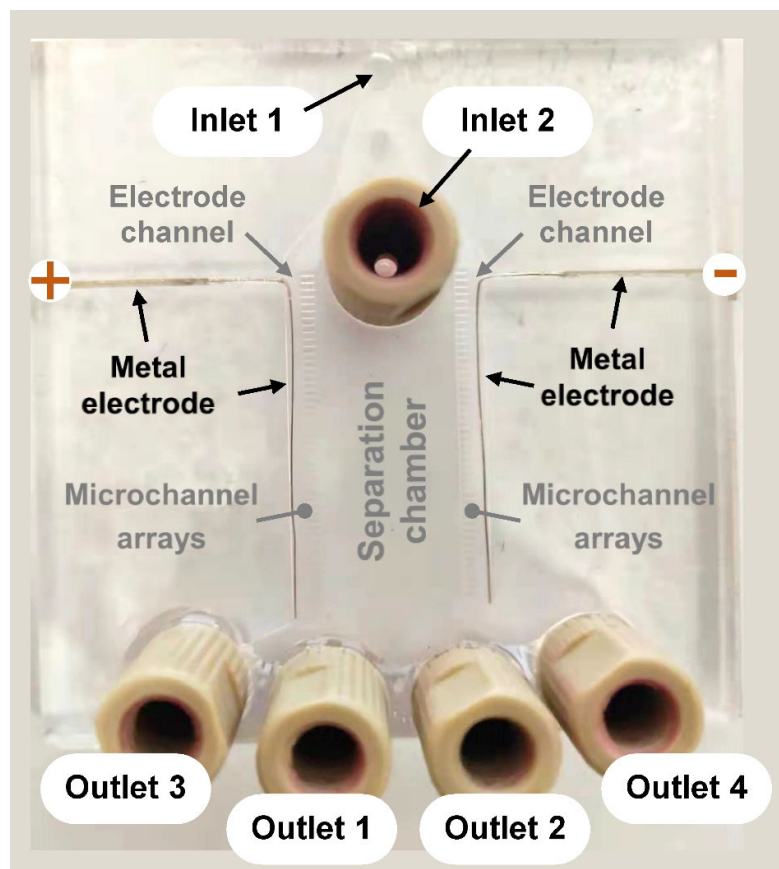

Figure S1. Photograph of a glass-based  $\mu$ FEE chip.

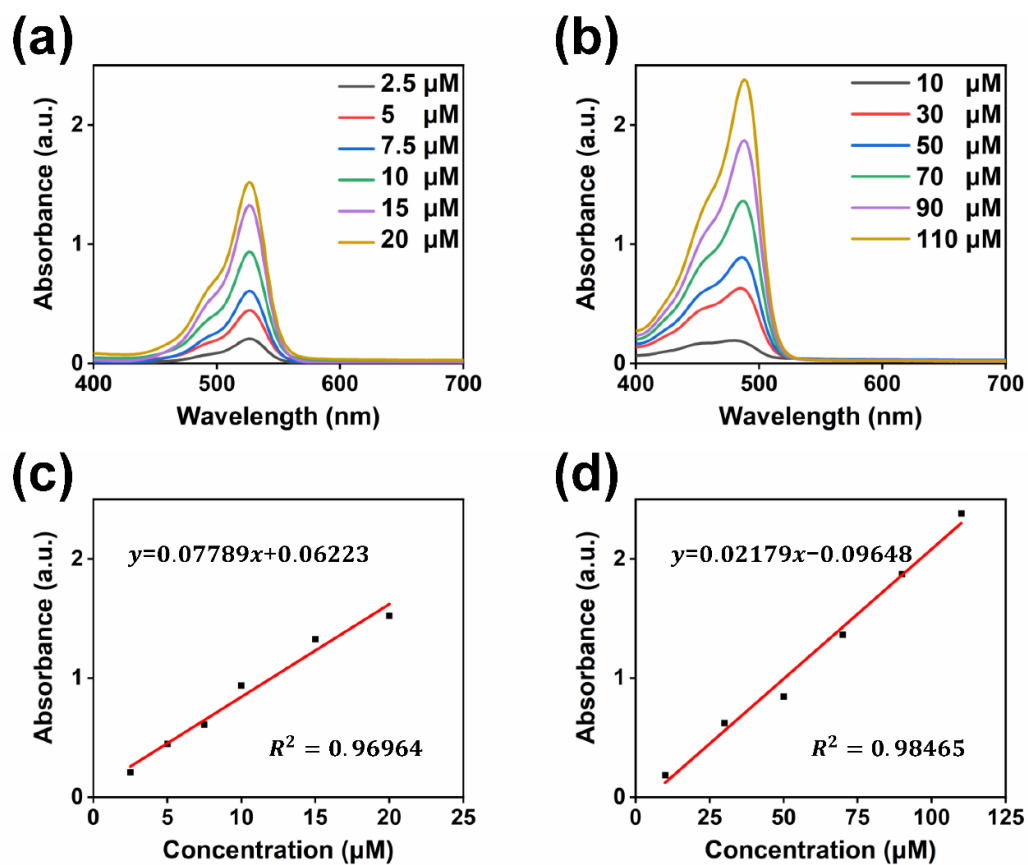

**Figure S2.** Absorption spectra of (a) Rh6G and (b) NaFL solutions at different concentrations. Absorbance curves of (c) Rh6G and (d) NaFL solutions at different concentrations.

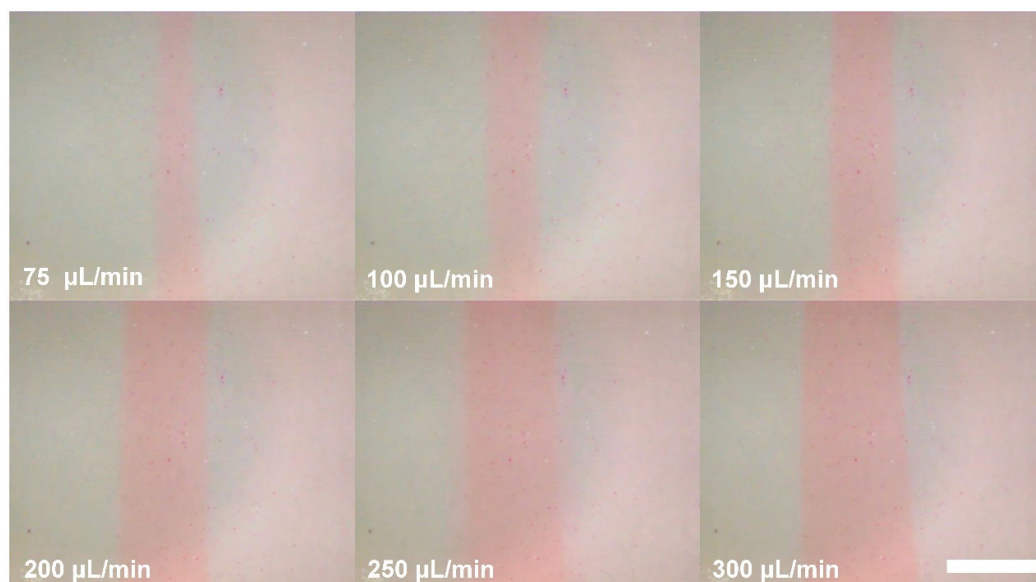

**Figure S3.** Optical micrographs of the sample solution in the separation chamber at different flow rates of the sample solutions ranging from 75  $\mu\text{L}/\text{min}$  to 300  $\mu\text{L}/\text{min}$ . The flow rate of the buffer solution was set at 3  $\text{mL}/\text{min}$ . Scale bar: 2.5 mm.

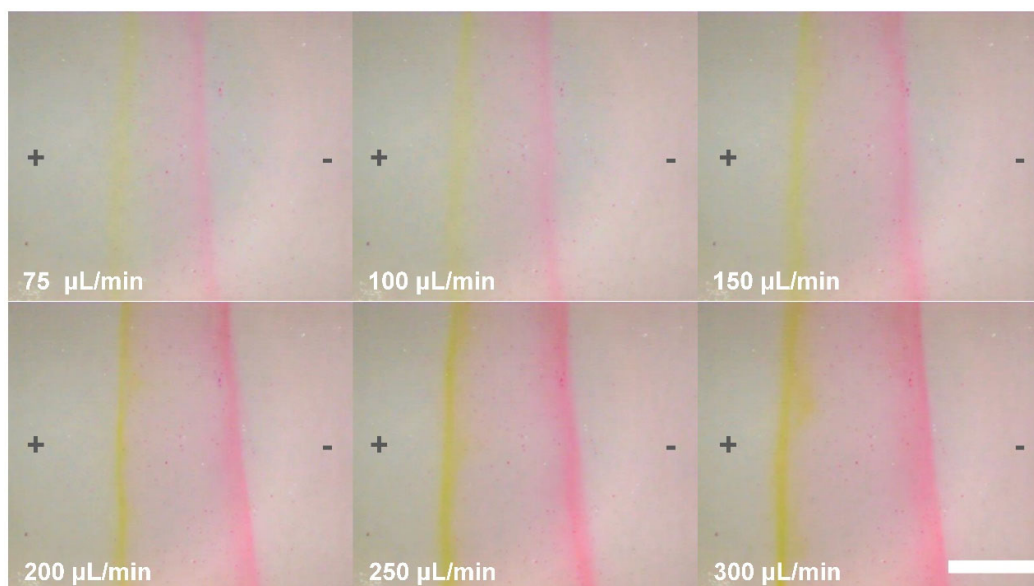

**Figure S4.** Optical micrographs of the sample solution in the separation chamber at an applied voltage of 250 V with different flow rates of the sample solutions ranging from 75  $\mu\text{L}/\text{min}$  to 300  $\mu\text{L}/\text{min}$ . The flow rate of the buffer solution was set at 3 mL/min. The direction of the electric field was from left (+) to right (-). Scale bar: 2.5 mm.

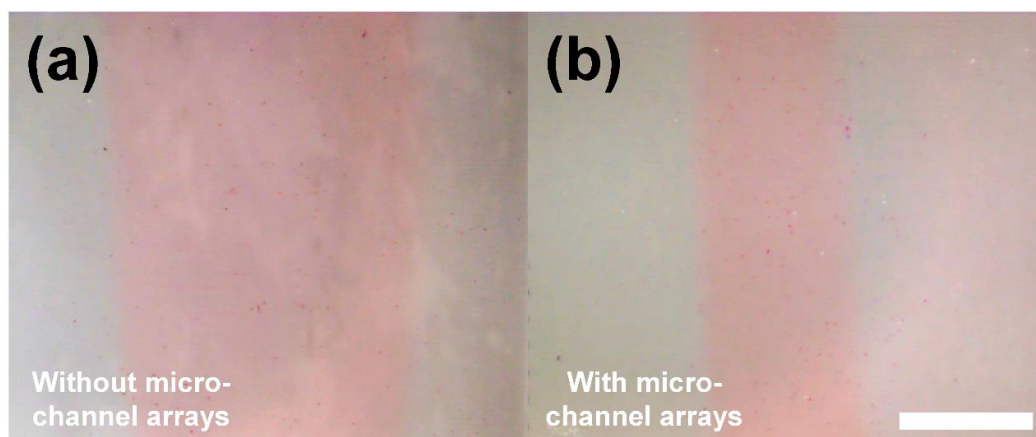

**Figure S5.** Optical micrographs of the sample solution in the separation chamber (a) without and (b) with microchannel arrays. The average widths of the sample stream in (a) and (b) were  $\sim 5.7$  mm and  $\sim 2.9$  mm, respectively. Both widths of the separation chamber in (a) and (b) are 10 mm. The flow rates of the sample solution and the buffer solution were set at  $200\ \mu\text{L}/\text{min}$  and  $3\ \text{mL}/\text{min}$ , respectively. Scale bar: 2.5 mm.

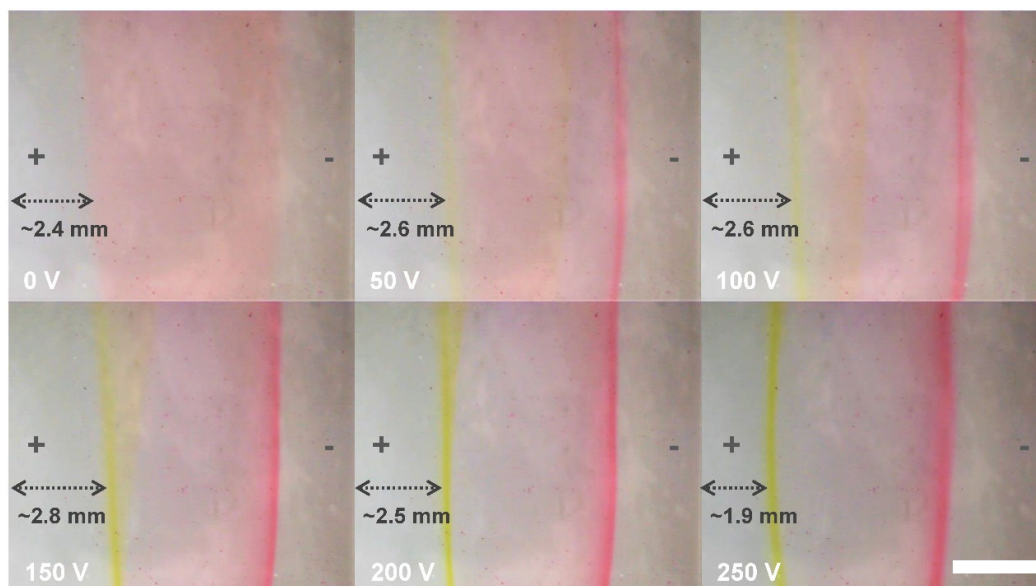

**Figure S6.** Optical micrographs of the sample solution in the separation chamber without microchannel arrays at different applied voltages ranging from 0 V to 250 V. The flow rates of the sample solution and the buffer solution were set at 200  $\mu\text{L}/\text{min}$  and 3  $\text{mL}/\text{min}$ , respectively. The direction of the electric field was from left (+) to right (-). With the increase of applied voltages from 150 V to 250 V, the sample stream shifted toward the positive electrode. Scale bar: 2.5 mm.

**Table S1.** Estimated concentrations of separated Rh6G and NaFL solutions collected from outlet 1 at different applied voltages.

| Applied Voltage (V) | Concentration of Rh6G Solution ( $\mu\text{M}$ ) | Concentration of NaFL Solution ( $\mu\text{M}$ ) |
|---------------------|--------------------------------------------------|--------------------------------------------------|
| 50                  | 10.524                                           | 53.532                                           |
| 100                 | 4.812                                            | 47.56                                            |
| 150                 | 2.269                                            | 39.994                                           |
| 200                 | 1.871                                            | 39.214                                           |
| 250                 | 0.780                                            | 37.149                                           |

**Table S2** Estimated concentrations of separated Rh6G and NaFL solutions collected from outlet 1 at different flow rates of sample solutions.

| Flow rate of sample solution<br>( $\mu\text{L}/\text{min}$ ) | Concentration of Rh6G solution<br>( $\mu\text{M}$ ) | Concentration of NaFL solution<br>( $\mu\text{M}$ ) |
|--------------------------------------------------------------|-----------------------------------------------------|-----------------------------------------------------|
| 75                                                           | 0.434                                               | 23.473                                              |
| 100                                                          | 0.600                                               | 35.772                                              |
| 150                                                          | 1.576                                               | 44.997                                              |
| 200                                                          | 2.269                                               | 39.994                                              |
| 250                                                          | 5.107                                               | 67.209                                              |
| 300                                                          | 7.598                                               | 74.322                                              |
